# Supplementary material
Source: MDPI journal article supplement (https://www.mdpi.com/2071-1050/12/7/2991)
Supplement: s1 [file s1]

## Sheet: Sheet1
Basic cost of disposing of unit mass TWR conventionally
Parameters	Description	Unit	Value(min)	Value(max)
F01	Basic cost of building a new tailing storage	CNY/t	15	25
F02-1	Slurry disposal cost	CNY/t	5
F02-2	Dry stacking cost	CNY/t	15
F0	Basic cost of disposing of unit mass TWR conventionally	CNY/t	20	40
Yield of TWR in conventional mining in gold mines
Parameters	Description	Unit	Value	Case1	Case2	Case4	Case4
γ	Concentrate yield	-	0.03	0.0332	0.0427	0.05	0.03
ω0	Mass ratio between waste rock and ores under the conventional mining mode	-	1.20479
	Waste rocks discharge intensity of gold ores	-	47.3
	Tailings dischatge intensity of gold ores	-	38.26
τ0	Yield of TWR in conventional mining	-	2.17479
τg	Yield of TWR in for the green mining	-	0.97
Area of land polluted by unit mass TWR when disposing them of conventionally
	Project name of tailing storage	Capacity(t)	Floor area(km2)	Area of land coverd by unit mass TWR(m2/t)
Case1	Xiaomiaogou tailing storage in Nanfen iron mine, Liaoning province	273000000	7.65	0.028022
Case2	Lijiaquan tailing storage	3000000	0.1	0.0333333
Case3	Tailing storage in Maanshan iron mine, Anhui province	500000000	20	0.04
Case4	Tailing storage in Xiangshan pyrite mine	7800000	0.23	0.0294872
Case5	Tailing storage in Tongling copper mine	1680000	0.05	0.0297619
Case6	Tailing storage in Xiangshan uranium mine	58000000	1.63	0.0281034
			Average	0.0314513
Parameters	Description	Unit	Radius of influence	Value
p0	Area of land polluted by unit mass TWR when disposing them of conventionally	m2/t	2	0.125805
pg	Area of land polluted by unit mass TWR when disposing of them using environmentally friendly methods	m2/t	1	0.0314513
Specific duty environmental tax levied on pollutant emissions
Parameters	Description	Unit	Value
Tp	Specific duty environmental tax levied on pollutant emissions	CNY/t	15
Cost of treating unit area contaminated land
	Project name	Treatment area(hm)	Project investment(CNY)	Ft (CNY/m2)
Case1	Abandoned mine land rehabilitation in Yutai	17.87	16820000	94.1242
Case2	Tuanjie coal mine land rehabilitation and environmental remediation in Youyang	6.711	5168700	77.0183
Case3	Abandoned mine land rehabilitation in Jinhu	125.368	75372100	60.1207
Case4	Heavy metals soil remediation project in Wangcun, Xinxiang	30	16600000	55.3333
Case5	Heavy metals soil remediation project in Fuliang, Jingdezhen	6.667	2575300	38.6276
Case6	Heavy metals soil remediation project in Xinhe, Xingtai No.1	39.07	10924100	27.9603
Case7	Abandoned bauxite mine land rehabilitation in Sanmenxia	56	14282800	25.505
			Value	25~100
Comprehensive utilization rate of TWR
Year	Comprehensive utilization rate of TWR in China	References
2009	0.133	Annual Report on Comprehensive Utilization of China Resources (2014)
2010	0.156
2011	0.17
2012	0.1785
2013	0.191
2017	0.2209	Annual Report on Comprehensive Utilization of China Resources (2019)
2018	0.2769
2020(Expected)	0.35	Guiding Opinions of the Ministry of Industry and Information Technology on Promoting the Transformation and Upgrade of the Gold Industry (2017)
Value-R	10%~35%
Profit of comprehensive utilization of TWR
	Tailings utilization approaches	Utilization amount(t)	Profit(CNY)	r(CNY/t)	Comment
Case1	Reconcentration of gold tailings	380000	70000000	184.211
Case2	Producing building materials	100000	10000000	100
Case3	Reconcentration of gold tailings	10000	900000	90
Case4	Producing building materials	48000	2183900	45.4979
Case5	Producing building materials	230000	9000000	39.1304
Case6	Reconcentration of gold tailings and producing brick	100000	600000	6	gold grade of tailings 0.26 g/t
Value-r				20%~100%
Additional cost of disposing of unit mass TWR using environmentally friendly methods
Parameters	Description	Unit	Value
Fg	Additional cost of disposing of unit mass TWR using environmentally friendly methods	CNY/t	10~20
